# Supplementary material for: One-pot mass preparation of MoS2/C aerogels for high-performance supercapacitors and lithium-ion batteries
Source: Royal Society of Chemistry journal article supplement (doi:10.1039/c7nr03187d), 2017-01-01
Supplement: c7nr03187d1.pdf [file c7nr03187d1.pdf]

1

2

3

4

5

6

7

8

9

10

11

12

13

14

## Supporting Information

15 **One-Pot Mass Preparation of MoS<sub>2</sub>/C Aerogel for High-**

16 **Performance Supercapacitors and Lithium-Ion Batteries**

17

18 **Yan Zhang, Ting He, Guanglei Liu, Lianhai Zu and Jinhua Yang\***

19 Corresponding author E-mail: [yangjinhua@tongji.edu.cn](mailto:yangjinhua@tongji.edu.cn)

20

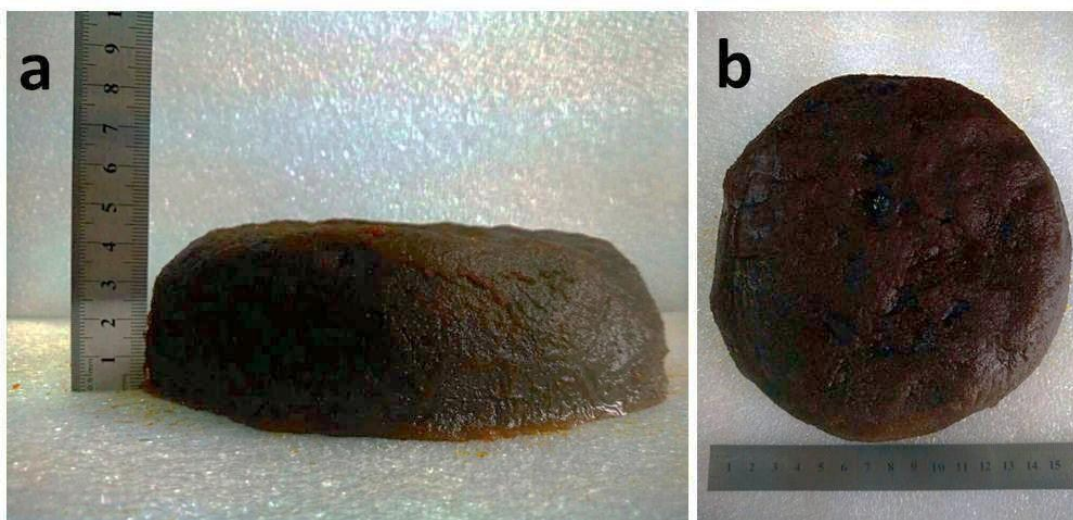

1

2 **Fig. S1** Optical photographs of the obtained precursor gel in a larger scale.

3

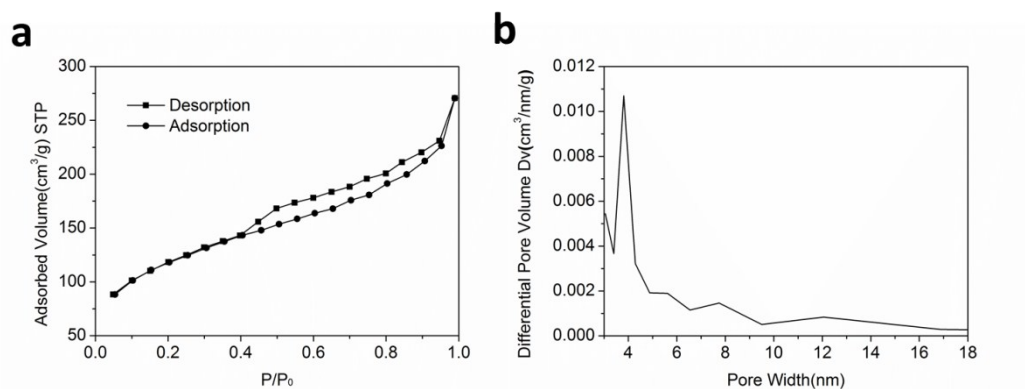

4

5 **Fig. S2** (a) Nitrogen adsorption-desorption isotherms and (b) pore-size distribution  
6 curves of the MoS<sub>2</sub> composite aerogel.

7

8

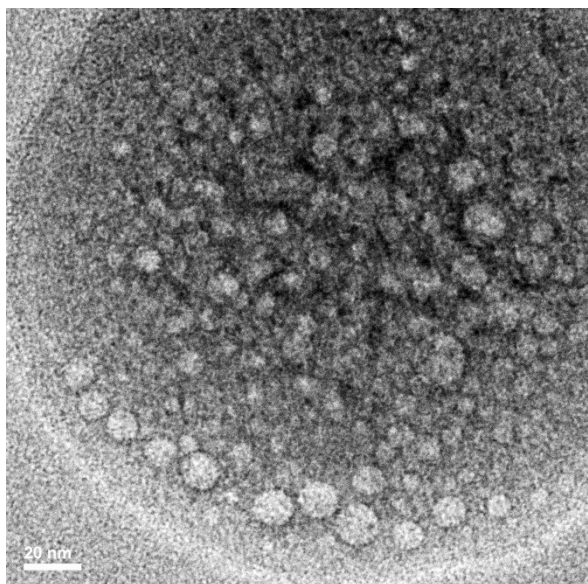

1  
2 **Fig. S3** TEM image of the MoS<sub>2</sub>/C composite aerogel.

3

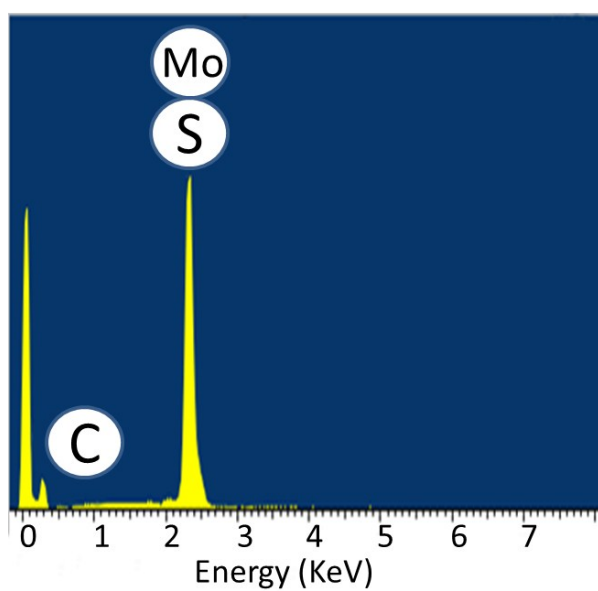

4  
5 **Fig. S4** Energy dispersive X-ray spectrometry (EDS) spectrum of the MoS<sub>2</sub>/C  
6 composite aerogel.

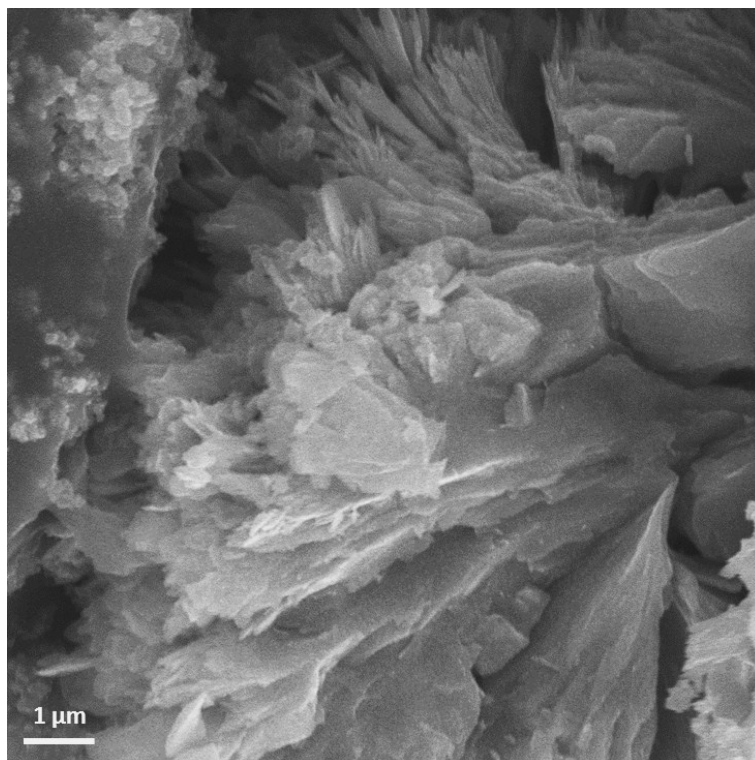

1

2 **Fig. S5** SEM image of MC-3 overloaded with MoS<sub>2</sub>.

3

4 **Tab. S1** Summary of electrochemical performance comparisons of various MoS<sub>2</sub>/C  
5 composites used as electrode materials in supercapacitors.

|   | <b>Material</b>                                | <b>Capacity at (X)<br/>Current Density</b>      | <b>Coulombic Efficiency<br/>after (Y) Cycles</b> | <b>At Current<br/>Density</b> |
|---|------------------------------------------------|-------------------------------------------------|--------------------------------------------------|-------------------------------|
| a | MoS <sub>2</sub> /RGO@PANI                     | 1224 F g <sup>-1</sup> (1 A g <sup>-1</sup> )   | 82.5% (3 000)                                    | 10 A g <sup>-1</sup>          |
| b | three-dimensional<br>graphene/MoS <sub>2</sub> | 410 F g <sup>-1</sup> (1 A g <sup>-1</sup> )    | 80.3% (10 000)                                   | 2 A g <sup>-1</sup>           |
| c | MoS <sub>2</sub> /N-doped<br>graphene          | 245 F g <sup>-1</sup> (0.25 A g <sup>-1</sup> ) | 91.3% (1 000)                                    | 2 A g <sup>-1</sup>           |
| d | MoS <sub>2</sub> /microporous<br>carbons       | 189 F g <sup>-1</sup> (1 A g <sup>-1</sup> )    | 98% (3 000)                                      | 10 A g <sup>-1</sup>          |
| e | MoS <sub>2</sub> /PANI                         | 552 F g <sup>-1</sup> (0.5 A g <sup>-1</sup> )  | 79% (6 000)                                      | 1 A g <sup>-1</sup>           |
|   | <b>This work</b>                               | 712.6 F g <sup>-1</sup> (1 A g <sup>-1</sup> )  | 97.3% (13 000)                                   | 6 A g <sup>-1</sup>           |

6 Note: a, b, c, d and e correspond to Ref.s 29, 30, 31, 32 and 33, respectively, in the  
7 main text.

8

1 **Tab. S2** The mass percentage of MoS<sub>2</sub> and C in the three samples, calculated based  
2 on ICP results.

| <b>Sample</b> | <b>Mass percentage of MoS<sub>2</sub> (%)</b> | <b>Mass percentage of C (%)</b> |
|---------------|-----------------------------------------------|---------------------------------|
| MC-1          | 22.9                                          | 77.1                            |
| MC-2          | 41.3                                          | 58.7                            |
| MC-3          | 59.2                                          | 40.8                            |

3
